# Supplementary material
Source: Research Square preprint supplement (doi:10.21203/rs.3.rs-10210622/v1)
Supplement: Supplementary file 2 [file a829e3d4512c9959438c1f83.docx]

**Appendix A: Measurement Scales**

**Table A.1**

*Perceived Ease of Use (PEU) Items*

| **Item** | **Statement** |
| --- | --- |
| PEU1 | I find it easy to get AI tools to do what I want them to do. |
| PEU2 | Learning to use AI tools is not easy for me. (reverse-coded) |
| PEU3 | Interacting with AI-based systems is easy for me. |
| PEU4 | I find AI tools flexible to interact with. |
| PEU5 | I do not find AI tools easy to use. (reverse-coded) |
| PEU6 | For me, using AI tools is possible without excessive extra effort. |

*Note.* All items were measured on a 5-point Likert scale. All reverse-coded items were recoded before data analysis.

**Table A.2**

*Perceived Usefulness (PU) Items*

| **Item** | **Statement** |
| --- | --- |
| PU1 | Using AI tools for my coursework enhances my productivity. |
| PU2 | AI tools do not make it easier for me to complete my academic work. (reverse-coded) |
| PU3 | AI tools enable me to accomplish my academic tasks more quickly. |
| PU4 | AI tools improve the quality of my work in my education. |
| PU5 | Using AI tools helps me achieve better results in my coursework. |
| PU6 | I do not find AI tools useful in my daily coursework. (reverse-coded) |
| PU7 | AI-based systems make my studying easier without limitations of location and time. |
| PU8 | AI tools are useful in understanding difficult concepts in study materials. |

*Note.* All items were measured on a 5-point Likert scale. All reverse-coded items were recoded before data analysis. Items PU6, PU7, and PU8 were dropped during measurement model assessment to achieve adequate convergent validity (AVE ≥ 0.50).

**Table A.3**

*Behavioral Intention (BI) Items*

| **Item** | **Statement** |
| --- | --- |
| BI1 | I intend to adopt (or continue to adopt) AI tools for my classes in the future. |
| BI2 | I would not use (or continue to use) AI tools if I were given the opportunity. (reverse-coded) |
| BI3 | I plan to use (or continue to use) AI applications regularly for academic assignments. |
| BI4 | I would recommend the use of AI tools to friends as a learning aid. |
| BI5 | I intend to explore new features of AI tools for academic purposes. |

*Note.* All items were measured on a 5-point Likert scale. All reverse-coded items were recoded before data analysis.

**Table A.4**

*Willingness to Pay (WTP) Measure*

| **Item** | **Question** | **Response Format** |
| --- | --- | --- |
| WTP | If AI tools were no longer free, how much would you be willing to pay per month to access all AI tools combined for academic purposes? (Please insert zero “0” if you don't want to pay for AI tools). | Open-ended monetary value (USD per month) |

*Note.* WTP was measured as a single-item, open-ended question where participants entered a numeric value representing their maximum monthly willingness to pay in U.S. dollars. Participants were instructed to enter “0” if they were unwilling to pay. Prior to this question, participants were informed that "AI tools" referred to "Generative AI tools (AI tools that can create new content or paraphrasing AI tools)" and had already indicated which specific tools they used (e.g., ChatGPT, Grammarly, Copilot).
