# Supplementary material
Source: Research Square preprint supplement (doi:10.21203/rs.3.rs-10210622/v1)

**Figure**

*Graphical Abstract*


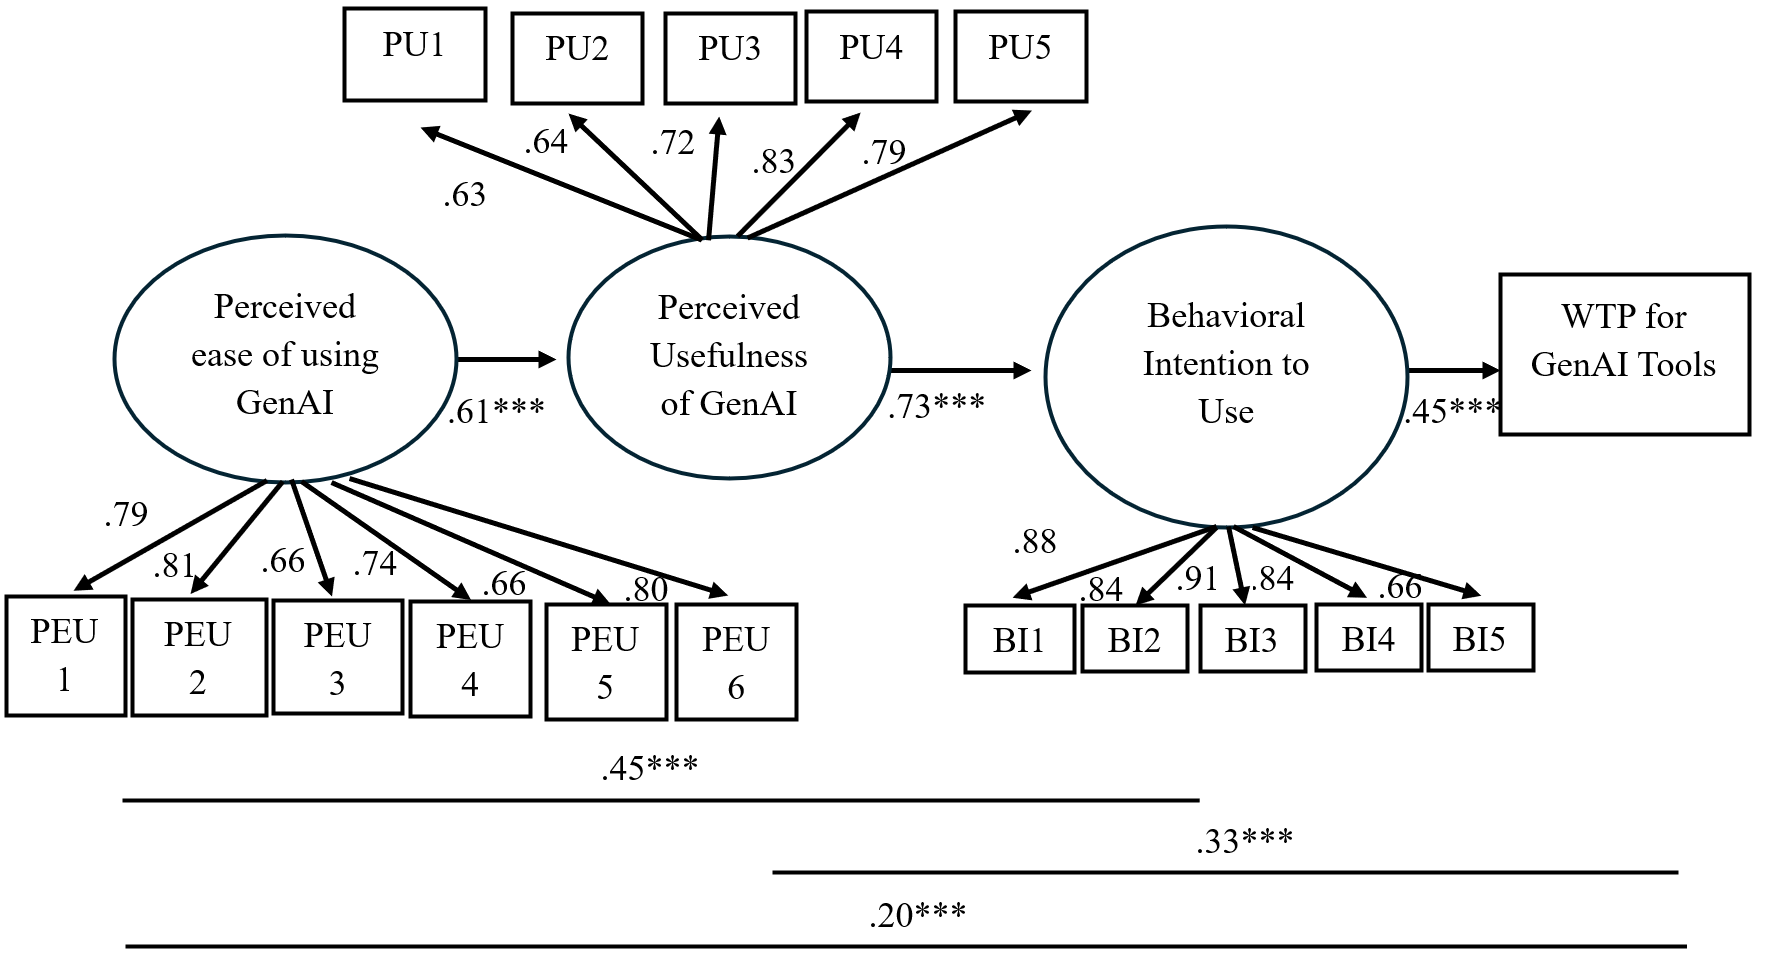

Supplement: Supplementary file 1 [file 1b086c597740133f95017bc4.docx]
